# Supplementary material for: Dynamic capsule restructuring by the main pneumococcal autolysin LytA in response to the epithelium
Source: PubMed Central journal article supplement (PMC4773454; doi:10.1038/ncomms10859), 2016-02-29
Supplement: ncomms10859-s1.pdf [file ncomms10859-s1.pdf]

## Supplementary figure 1

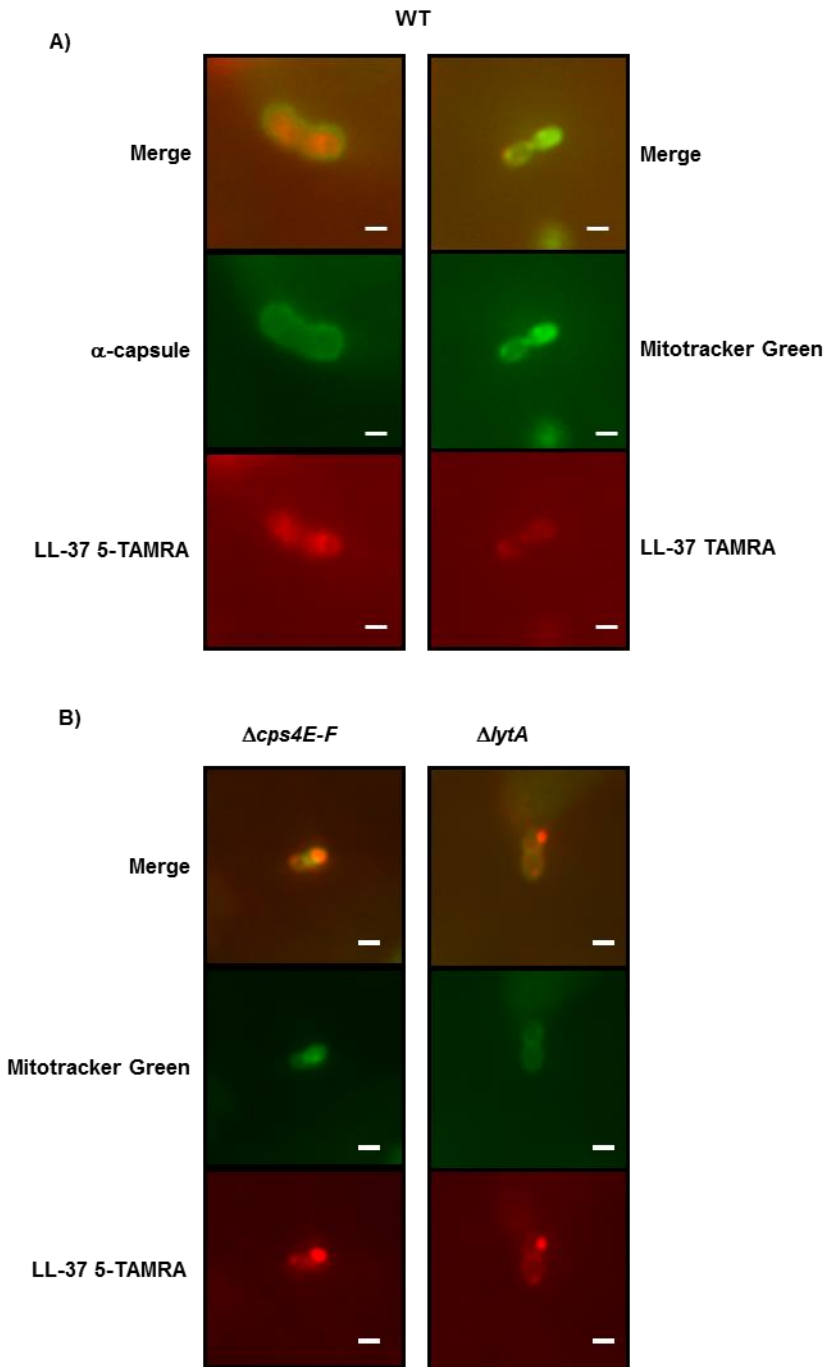

**Supplementary Figure 1: Localization of LL-37.** A) Wild Type TIGR4 (WT) bacteria were grown as for a shedding assay. Samples were then split and co-stained with LL-37 conjugated to a fluorescent dye (LL-37 5-TAMRA), and either anti-capsule immune-staining ( $\alpha$ -capsule) or the membrane dye MitoTracker Green FM (Mitotracker Green). B) The mutant pneumococcal TIGR4 derivative strains  $\Delta cps4E-F$  (unencapsulated) or  $\Delta lytA$  ( $LytA^-$  strain) were grown as in A), and then co-stained with LL-37 5-TAMRA and MitoTracker Green FM. All experiments were repeated three times and representative micrographs from one experiment are presented. Scale bar = 1  $\mu$ m.



## Supplementary Figure 2

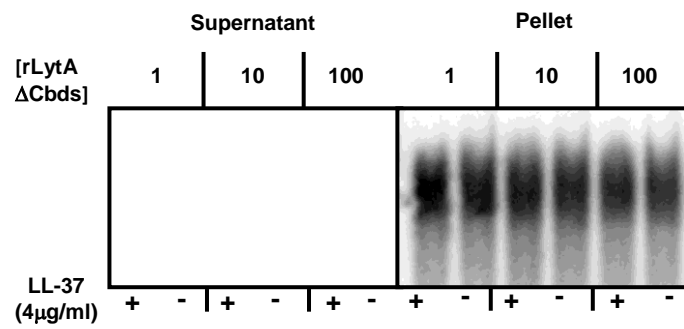

**Supplementary Figure 2: Addition of LytA without choline binding domains to shedding assay.** The *lytA* mutant was subjected to a capsule shedding assay, and recombinant LytA protein with choline binding domains deleted (rLytA  $\Delta$ Cbds) was added at the indicated concentration to the assay. LL-37 was added to the indicated cultures at 4  $\mu$ g/ml. The supernatant and pellet fractions were then analyzed by capsule blot.

### Supplementary Figure 3

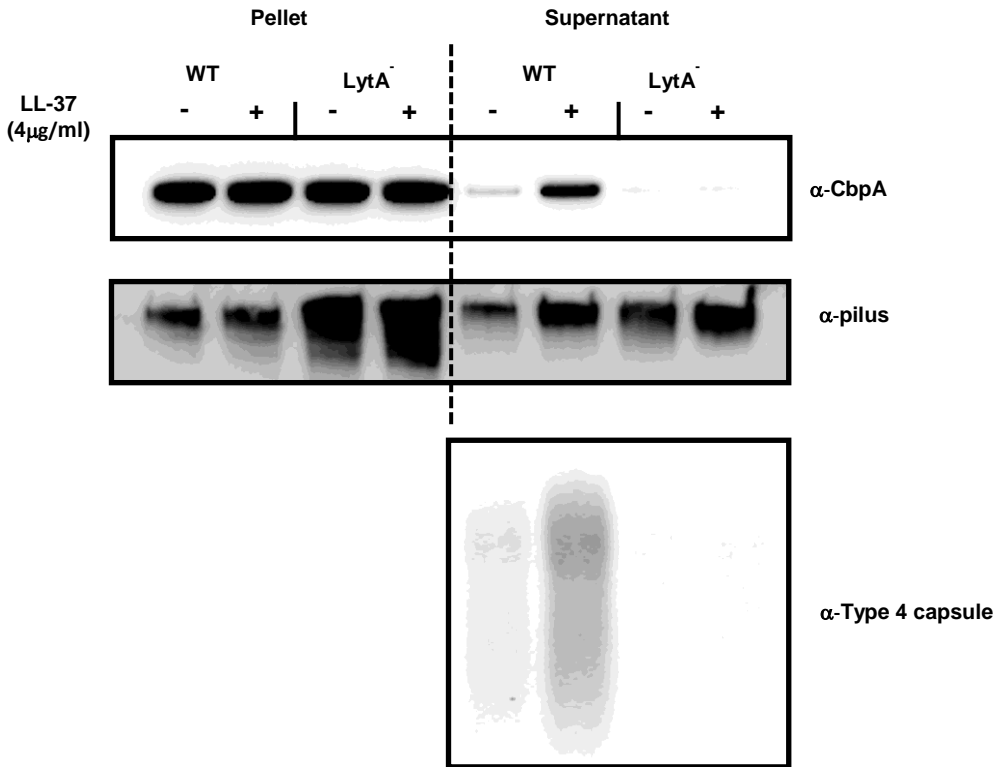

#### Supplementary Figure 3: Localization of cell wall attached proteins after LL-37 exposure.

Either TIGR4 (WT) or the LytA<sup>-</sup> mutant (LytA<sup>-</sup>) were grown and processed for a capsule shedding assay. After separating pellet and supernatant fractions, samples were taken and analyzed by Western blot using serum against CbpA ( $\alpha$ -CbpA), pilus ( $\alpha$ -pilus), or capsule blot ( $\alpha$ -Type 4 capsule). The experiment was replicated 3 times and the blots presented are from on representative experiment.

### Supplementary Figure 4

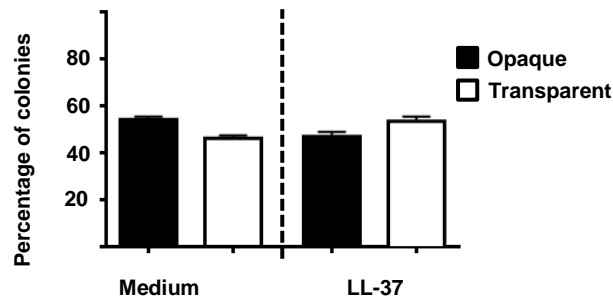

**Supplementary Figure 4: Effect of LL-37 exposure on colony morphology.** Wild type TIGR4 was grown in medium supplemented with LL-37 (4 $\mu$ g/ml) or un-supplemented (Medium) as indicated then plated on solidified agar medium. Colony morphology was assessed by observation under dissecting microscope with oblique illumination. The results are percentage of colonies displaying either opaque or transparent morphology mean and standard error from 3 independent experiments.

### Supplementary Figure 5

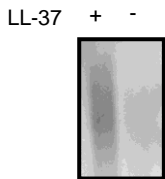

**Supplementary Figure 5: Capsular shedding of a penicillin resistant strain.** The highly penicillin resistant strain South Africa 8249 was subjected to a standard capsule shedding assay with 4 $\mu$ g/ml LL-37. The supernatant fraction was then analyzed by capsule blot.

Supplementary Figure 6

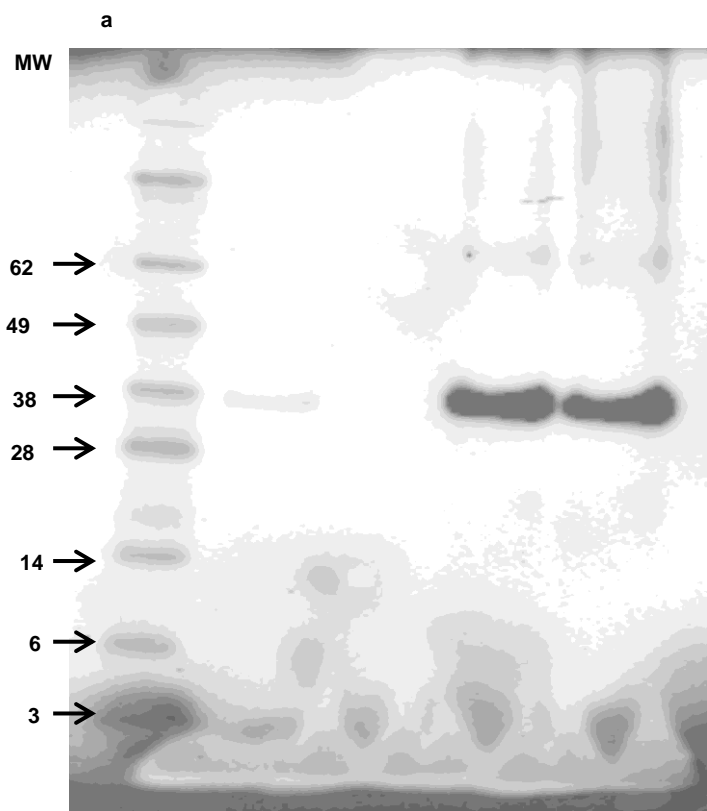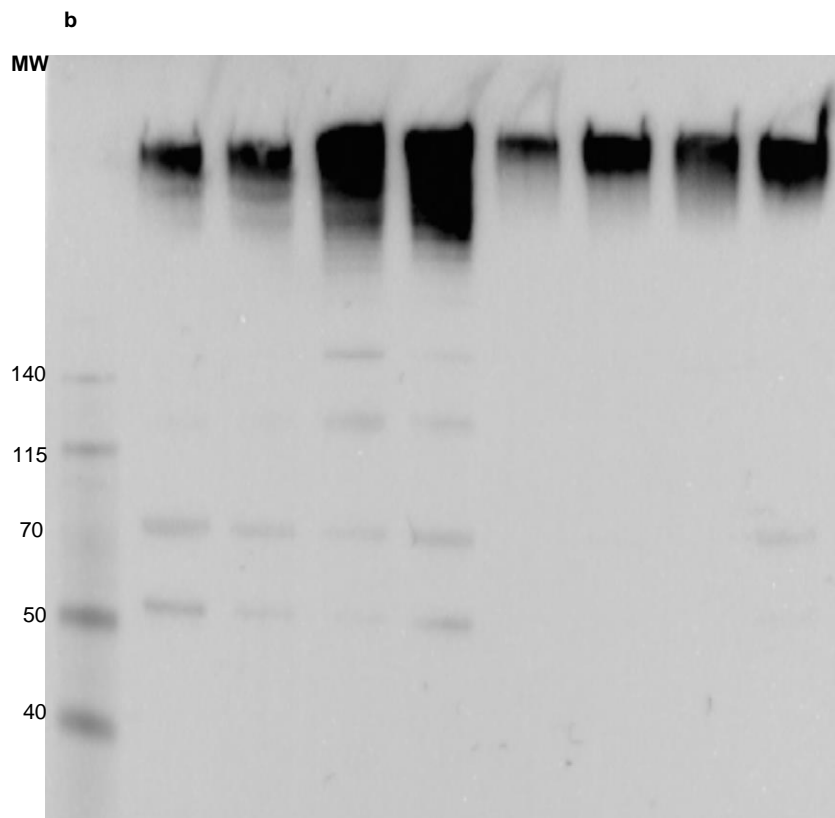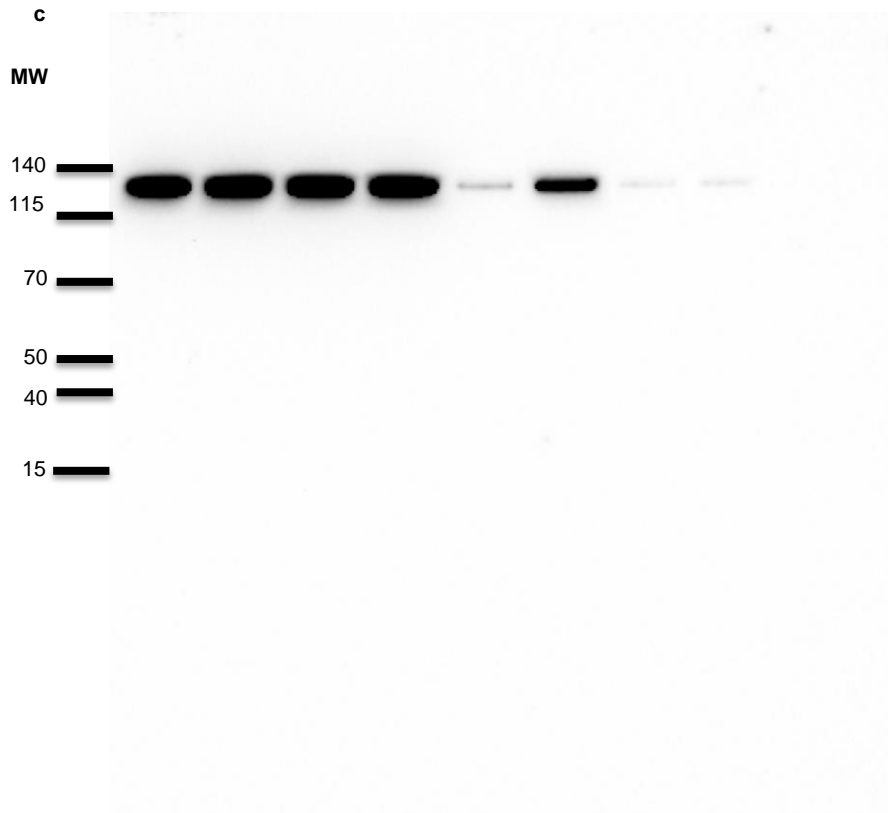

**Supplementary Figure 6: Full length western blots.** Full length western blots with molecular weight marker sizes indicated (MW column) in kilodaltons. Full length blot from figure 3b a). Full length blot from Supplementary figure 3 pilus b) and CbpA c).

**Supplementary Table 1: *Streptococcus pneumoniae* Strains used in this study**

| Strain                        | Relevant Genotype                                                            | Source                   |
|-------------------------------|------------------------------------------------------------------------------|--------------------------|
| TIGR4 (CKB001)                | Wild type (serotype 4)                                                       | TIGR.org                 |
| LytA- (CKB410)                | TIGR4 $\Delta$ SP_1937:: <i>ermB</i>                                         | This study               |
| LytA- empty vector (CKB629)   | TIGR4 $\Delta$ SP_1937:: <i>ermB</i> pABG5                                   | This study               |
| LytA- pLytA (CKB621)          | TIGR4 $\Delta$ SP_1937:: <i>ermB</i> pABG5: <i>lytA</i> -6xHIS               | This study               |
| LytA- pLytA- (CKB627)         | TIGR4 $\Delta$ SP_1937:: <i>ermB</i> pABG5: <i>lytA</i> -6xHIS (H147A,D149A) | This study               |
| TIGR4 unencapsulated (CKB424) | TIGR4 $\Delta$ SP_0360-361:: <i>ermB</i>                                     | This study               |
| TIGR4 empty vector (CKB596)   | Wild type pABG5                                                              | This study               |
| A66.1                         | Wild type (serotype 3)                                                       | Perkin Elmer, cat 119247 |
| A66.1 LytA- (CKB524)          | $\Delta$ <i>lytA</i> :: <i>ermB</i>                                          | This study               |
| 6A4 (CKB502)                  | Wild type (serotype 6A)                                                      | [1]                      |
| 6A4 LytA- (CKB512)            | $\Delta$ <i>lytA</i> :: <i>ermB</i>                                          | This study               |
| South Africa 8249             | Wild type, Penicillin tolerant (serotype 19F)                                | [2]                      |
| D39                           | Wild type (serotype 2)                                                       | NCTC 7466                |



**Supplementary Table 2: Primers Used in this Study**

| Purpose                                                           | Primer Name | Sequence                                                |
|-------------------------------------------------------------------|-------------|---------------------------------------------------------|
| deletion of <i>lytA</i><br>(SP_1937)                              | CK330       | CTCTTGGAGCAAGGTTTGGC                                    |
|                                                                   | CK505       | GTTTGCTTCTAAGTCTTATTTCCACATTAATTTCCATATTCTAC            |
|                                                                   | CK506       | GAGTCGCTTTTGTAAATTTGGCCAGATGGCTTGATTACAG                |
|                                                                   | CK333       | GAAAGCATCTAGTAACAGTTCC                                  |
| deletion of <i>cps4E-4F</i><br>(SP_0360-0361)                     | CK351       | GGAGTTCATTAAGAAGGCAG                                    |
|                                                                   | CK520       | GTTTGCTTCTAAGTCTTATTTCCATTCTATTTCCATTTGAC               |
|                                                                   | CK521       | GAGTCGCTTTTGTAAATTTGGGAGAGGGAAAGTAAGAAAG                |
|                                                                   | CK522       | CCATGAAGTTATCACAATTC                                    |
| Cloning of <i>lytA</i>                                            | CK613       | CCCCTCGAGCATTTCCTCTAGTGAAAATCG                          |
|                                                                   | CK614       | CCCGGATCCGAGCATAACTTTCTAGTTTGC                          |
| Addition of c-terminal<br>6x-His tag to <i>lytA</i>               | CK639       | GCTGCTCATCACCATCACCATCACTAATAATAATGGAATGTCTT<br>TCAAATC |
|                                                                   | CK640       | TTTTACTGTAATCAAGCCATC                                   |
| mutagenesis of His147<br>and Asp149 in <i>lytA</i>                | CK648       | GTCTGAGTGGTTGTTTGGTTG                                   |
|                                                                   | CK649       | GCAGTTGCACCTTATCCATATCTTGC                              |
| Cloning of <i>lytA</i> with<br>choline binding<br>domains deleted | LytANd<br>e | CGCGGCATATGGAAATTAATGTGAG                               |
|                                                                   | LytABa<br>m | CGCGCGGGATCCTTAGCCGTTCTCAATATC                          |

**Supplementary Table 3: Proteins tested but not involved in capsule shedding**

| Locus Tag | Gene Name    | Description                                                                      |
|-----------|--------------|----------------------------------------------------------------------------------|
| SP_0369   | <i>pbp1A</i> | Penicillin binding protein, bifunctional transglycosyltransferase/transpeptidase |
| SP_1027   |              | Unknown                                                                          |
| SP_0368   |              | endo-alpha-N-acetylgalactosaminidase, cell wall localized                        |
| SP_1573   | <i>lytC</i>  | lysozyme, choline binding                                                        |
| SP_0965   | <i>lytB</i>  | endo-beta-N-acetylglucosaminidase                                                |
| SP_0648   | <i>bgaA</i>  | beta-galactosidase, cell wall localized                                          |

### Supplementary References

1. Lizcano, A., et al., *Early biofilm formation on microtiter plates is not correlated with the invasive disease potential of Streptococcus pneumoniae*. Microb Pathog, 2010. **48**(3-4): p. 124-130.
2. Zigelboim, S. and A. Tomasz, *Multiple antibiotic resistance in South African strains of Streptococcus pneumoniae: mechanism of resistance to beta-lactam antibiotics*. Rev Infect Dis, 1981. **3**(2): p. 267-76.
